# Supplementary material
Source: PubMed Central journal article supplement (PMC2077277)

## A. Supplement to Figure 1A

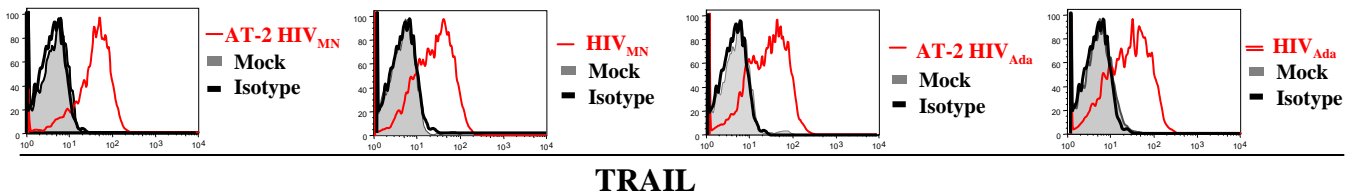

## B. Supplement to Figure 1B

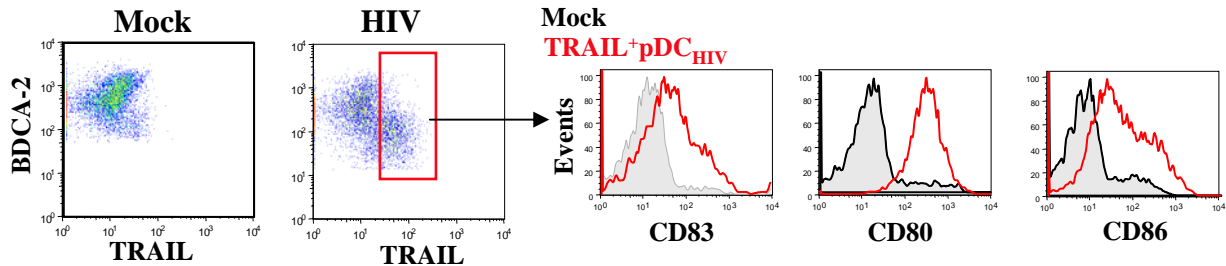

## C. Supplement to Figure 1C

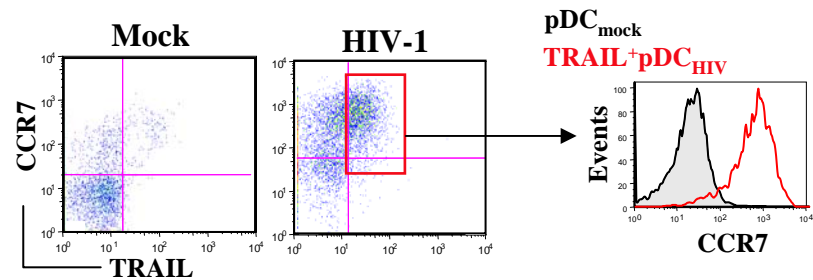

## D. Supplement to Figure 1D

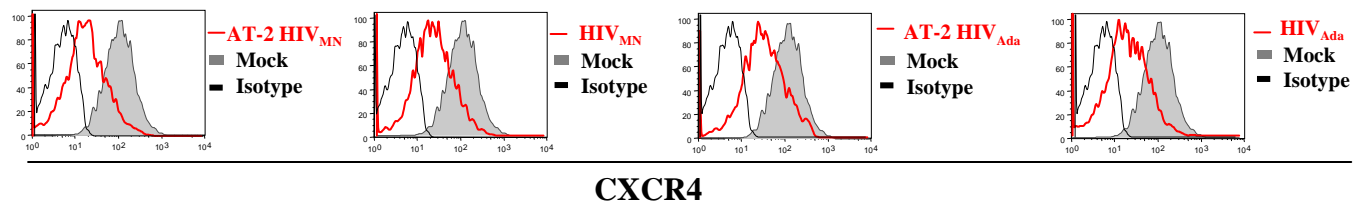

## E. Supplement to Figure 1G

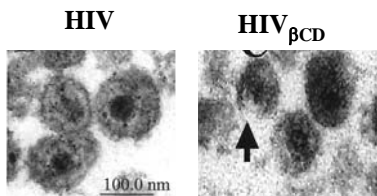

Supplement: pnas_0707244104_1.pdf [file pnas_0707244104_1.pdf]
