# Supplementary material
Source: PubMed Central journal article supplement (PMC2077277)

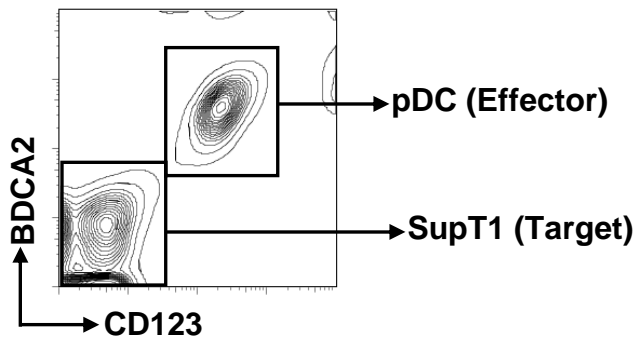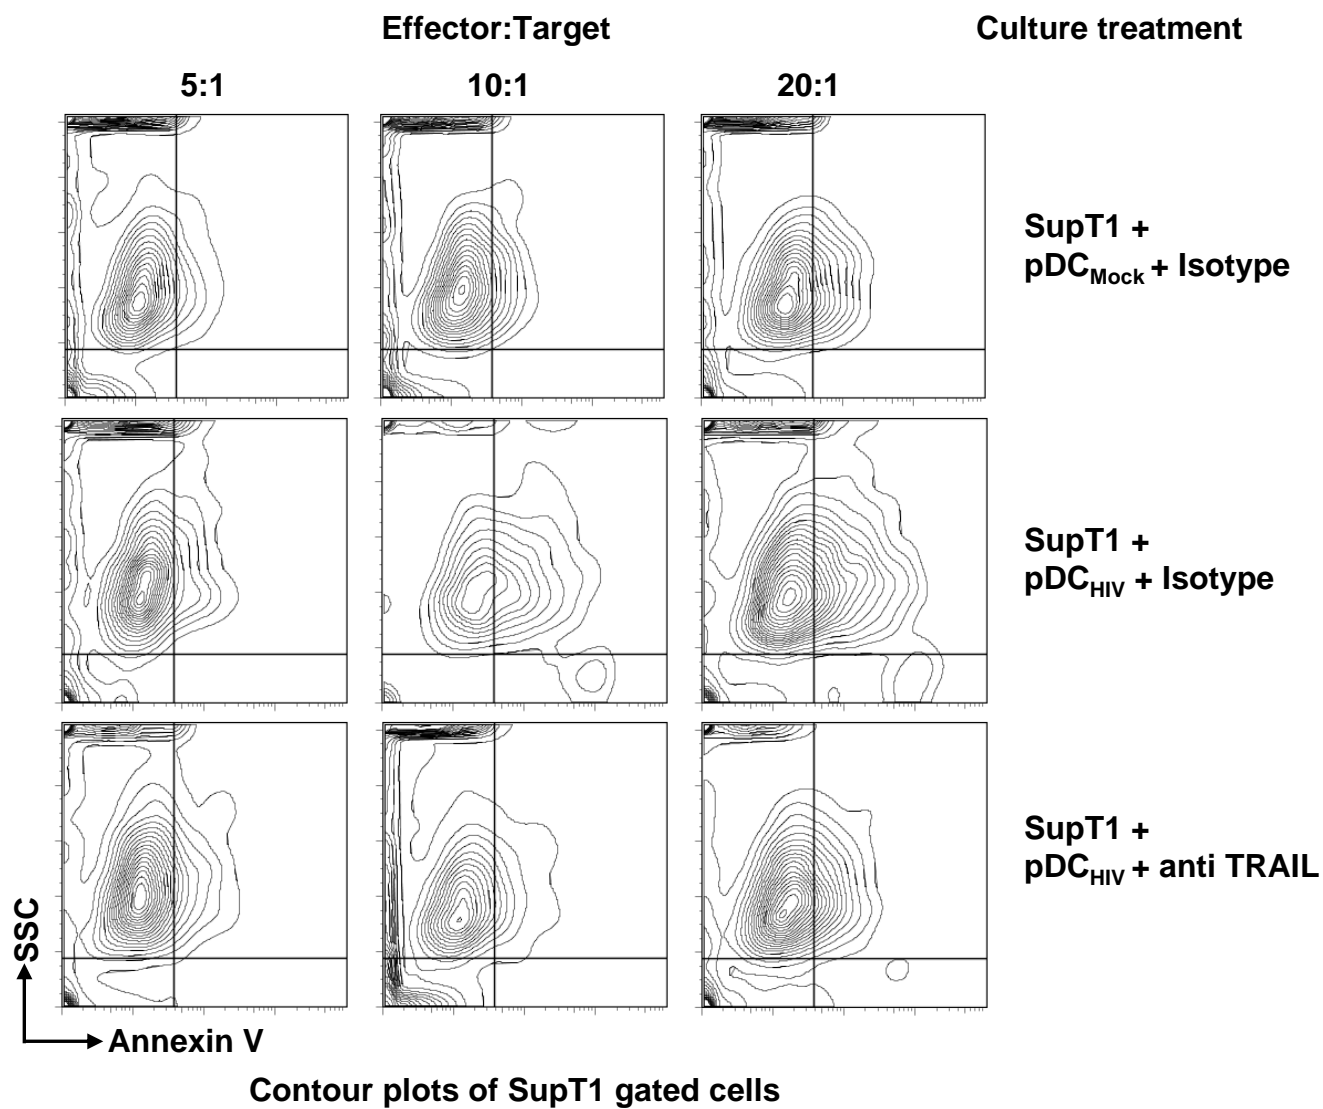

Supplement: pnas_0707244104_2.pdf [file pnas_0707244104_2.pdf]

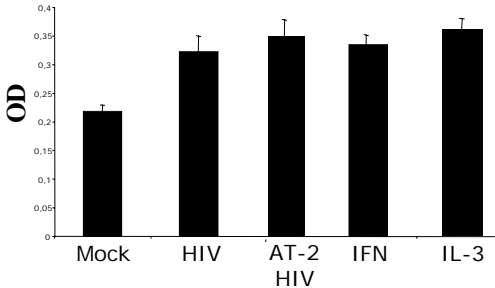

Supplement: pnas_0707244104_3.pdf [file pnas_0707244104_3.pdf]
